# Supplementary material for: Urban surface water flood modelling – a comprehensive review ofcurrent models and future challenges
Source: Copernicus journal article supplement (doi:10.5194/hess-2020-655), 2020-12-16
Supplement: Supplementary file [file hess-2020-655-RC2-supplement.pdf]

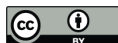

# Urban surface water flood modelling – a comprehensive review of current models and future challenges

Kaihua Guo<sup>1</sup>, Mingfu Guan<sup>1</sup>, Dapeng Yu<sup>2</sup>

<sup>1</sup>Department of Civil Engineering, the University of Hong Kong, Hong Kong, 00000, China

5 <sup>2</sup>Geography and Environment, Loughborough University, Loughborough, LE11 3TT, United Kingdom

*Correspondence to:* Mingfu Guan (mfguan@hku.hk)

**Abstract.** Urbanisation is an irreversible trend as a result of social and economic development. Urban areas, with high concentration of population, key infrastructure, and businesses are extremely vulnerable to flooding and may suffer severe socio-economic losses due to climate change. Urban flood modelling tools are in demand to predict surface water inundation caused by intense rainfall and to manage associated flood risks in urban areas. These tools have been rapidly developing in recent decades. In this study, we present a comprehensive review of the advanced urban flood models and emerging approaches for predicting urban surface water flooding driven by intense rainfall. The study explores the advantages and limitations of existing model types, highlights the most recent advances and identifies major challenges. Issues of model complexities, scale effects, and computational efficiency are also analysed. The results will inform scientists, engineers, and decision-makers of the latest developments and guide the model selection based on desired objectives.

10  
15

## 1 Introduction

Flooding is a common, widespread and frequent natural hazard that causes severe socio-economic loss and environmental impact worldwide (Barredo, 2009; Teng et al., 2017). Flood risk is exceptionally high in urban areas where the land surface varies, and anthropogenic activities cause remarkable changes in hydrological processes (Guan et al., 2015; Sillanpää et al., 2015). Urban surface water flooding (also called pluvial flooding) is generally triggered by intense rainfalls when the capacity of urban drainage systems are overwhelmed (Falconer et al., 2009; Chen et al., 2015). Flood risk management has historically focused on fluvial and coastal flooding, with significantly less emphasis on urban surface water flooding, which is most likely to increase in severity (UNISDR, 2015) and frequency (IPCC, 2013) due to climate change. Although often associated with shallow water, unlike fluvial and coastal flooding, the impact of surface water floods can be equally widespread. In cities, where impervious surfaces make surface water flooding most likely, the impacts can be particularly severe. Direct damage, via inundation of properties and critical infrastructure (e.g. electricity sub-stations and roads), and indirect consequences, such as loss of productivity and business opportunities, can occur (Barredo et al., 2012). Numerous studies have reported that urban surface water flooding has caused the tremendous socio-economic loss, which is expected to increase in the future with urbanisation, economic development, and more frequent extreme weather (Bernet et al., 2017; Barredo, 2009; Zhou et al.,

20  
25



30 2013; Moncoulon et al., 2016). Therefore, it is crucial for effective flood risk management and to develop modelling techniques that simulate and predict the dynamic processes of cloud burst-induced urban flooding.

Fluvial and coastal flood modelling and inundation mapping have been studied extensively and have become common practices in past decades (Neelz et al., 2013). These models greatly rely on the quality of topographic data and hydrological data as input. Different from river- and rural-catchment terrain, urban areas generally have more complex and irregular topography with buildings, drainage networks and other critical infrastructures. The dynamics and non-linear interactions of hydrological, hydrodynamic and hydro-morphological processes in this topography present substantial modelling challenges. Also, the heterogeneity of urban surface challenges the parametrisation of the urban flood model. Significant efforts have been made to advance the development of a reliable model, which is essential for building urban flood resilience (Song et al., 2014). Owing to the progress in computational power and data availability, the quality and complexity of these models have steadily increased, beginning with a simplified model framework a decade ago to more sophisticated numerical models in recent years (Mignota et al., 2019). Amongst these, four groups of models are the most concerned in the ongoing urban flood simulation research (Figure 1): (1) drainage network models (e.g. Djordjevic et al., 1999; Simoes et al., 2010); (2) shallow water-based models that solve simplified or full shallow water equations (SWEs) with a varying conceptualisation of sewer flows, e.g. the diffusive version of LISFLOOD-FP (Bates et al., 2010), CityCAT (Glenis et al., 2018) and HiPIMS (Xia et al., 2019); (3) hydrogeomorphic approaches that predict the inundation area based on geomorphic features (e.g. Nardi et al., 2013; Di Baldassarre et al., 2020); and (4) other methods such as cellular automata (CA) and artificial neural networks (ANN) (Ghimire et al., 2013; Guidolin et al., 2016; Berkhahn et al. 2019).

The accuracy and efficiency are generally two key indicators for evaluating the performance of these models but are often in conflict with each other. For the fast-simplified models, some key information is lost, leading to less accuracy in the results, without even including the key inundation feature. Sophisticated models can predict more flood information but at the cost of more high-quality data input and expensive computation. Although still in its infancy, models for reproducing the interaction of surface waters and drainage flows are being developed (Leandro et al., 2009; Seyoum et al., 2011; Bazin et al., 2014). Large-scale urban flood simulations is still a challenge for these models due to the requirement of extensive input data, such as a pipe network. Several studies have reviewed flood models for fluvial and coastal inundation (e.g. Teng et al., 2017), but none has systematically reviewed the specific type of models for urban surface water flooding driven by intense rainfall. This paper aims at evaluating the available urban flood models by exploring their advantages and disadvantages for various applications.

The paper will first present the systematic methodology for selection of literature in Section 2. Then, the methods of different types of urban flood models in the literature are summarised and overall described in Section 3. In Section 4, the main advantages and limitations of each model technique are evaluated and discussed, which provides guidance and suggestions for the optimization of the method/model in practical. Section 5 discusses future research needs and challenges. Conclusions are drawn in Section 5.

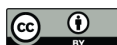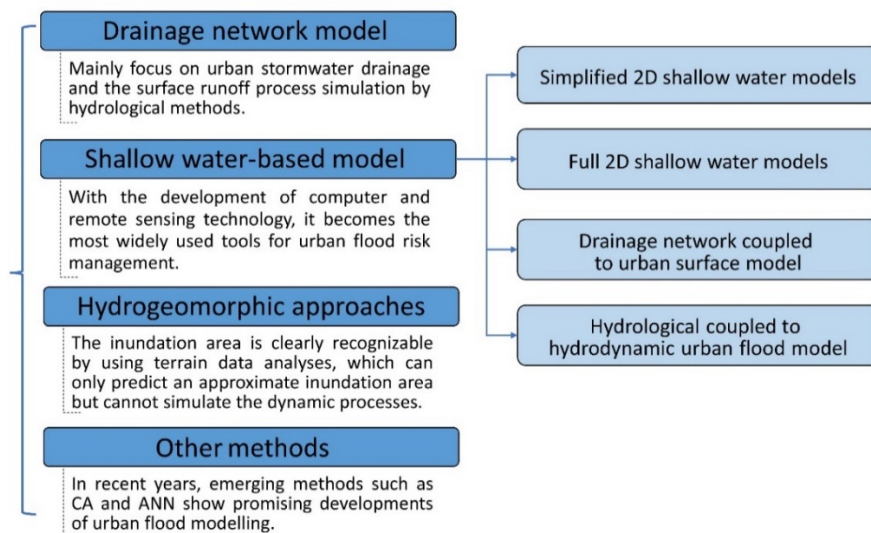

Figure 1: Four main groups of models in the ongoing research.

## 2 Methodology

65 A literature review means systematic, specific and repeatable. To meet this criterion, two steps were taken with pre-defined criteria to systematically filter and select all potential papers based on an established research methodology (Booth et al., 2011). This method can help scholars conduct a clearer and more valid review. The following is a detailed description of how to use this method for a systematic overview (Gradeci et al. 2019).

70 The research theme in the present study was determined as how urban storm-surface flood models have been developed and applied. In order to establish a research entry point and the preliminary investigation scope, the first step was to identify the keywords as search terms. With reference to the selected representative literature (Djordjevic et al., 1999; Simoes et al., 2010; Bradbrook et al., 2004; Bates et al., 2010; Glenis et al., 2018; Xia et al., 2019; Ghimire et al., 2013; Guidolin et al., 2016; Berkhahn et al. 2019), the keywords are determined as showing in Table 1. The search was conducted in the HKU library (Engineering) (the core databases are Engineering village 2, INSPEC, SciTech premium collection, Scopus and Web of Science) and Google Scholar. Furthermore, this review study concentrated on research models, rather than commercial models, which typically involve software applications.

75 The second step is the final screening, which is based on the chosen electronic database (HKU library (Engineering)) of peer-reviewed literature. The pre-defined exclusion criteria were set to screen the literature (Table 2). The search scheme is illustrated in Figure 2 and outlining the number of papers retained at each stage. There was no limitation to the research period and the search conducted on 06 October 2020. For the same model in different literature sources, newly published papers are



preferred. And journal papers take precedence over conference papers. Finally, 48 papers were selected. Literature pool is listed in the supplementary table.

**Table 1: review keywords.**

| What                                                                                                             | Where                                                                                                                                                | How                                                                                                                                              |
|------------------------------------------------------------------------------------------------------------------|------------------------------------------------------------------------------------------------------------------------------------------------------|--------------------------------------------------------------------------------------------------------------------------------------------------|
| <ul style="list-style-type: none"> <li>• Urban</li> <li>• Flood/inundation</li> <li>• Numerical model</li> </ul> | <ul style="list-style-type: none"> <li>• Storm</li> <li>• Precipitation</li> <li>• Rain</li> <li>• Surface water</li> <li>• Pluvial flood</li> </ul> | <ul style="list-style-type: none"> <li>• Analysis</li> <li>• Assessment</li> <li>• Risk</li> <li>• Validation</li> <li>• Verification</li> </ul> |

**Table 2: Exclusion criteria.**

| No. | Exclusion criterion                                 | What is excluded                                                                                                                                                                         |
|-----|-----------------------------------------------------|------------------------------------------------------------------------------------------------------------------------------------------------------------------------------------------|
| 1   | Qualitatively based on the type of literature       | Literature other than journal articles and conference papers printed in English; Proceeding Papers; Books/Chapters                                                                       |
| 2   | Scientifically based on keywords, titles            | Focus on other types of floods like fluvial flood or coastal flood; urban land use pattern analysis; description of urban flood risk; flood risk assessment; large-scale flood research. |
| 3   | Scientifically based on abstract                    |                                                                                                                                                                                          |
| 4   | Scientifically based on article, quality assessment |                                                                                                                                                                                          |
| 5   | Scientifically based on the model updating          | Algorithms or frameworks have been improved and published, only focus on applications of published model                                                                                 |

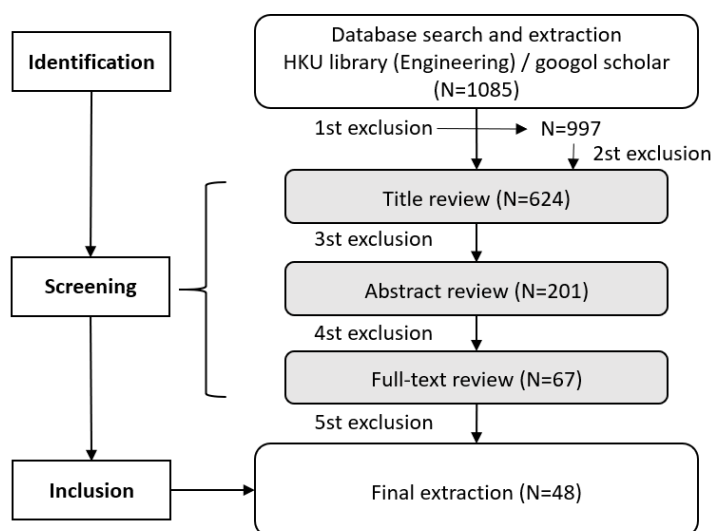

85

**Figure 2: Preferred Reporting Items for Systematic Reviews and Meta-Analyses (PRISMA) framework showing the literature screening process.**

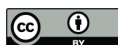

### 3 Methods for urban surface water flooding

As introduced above, models are classified by four types. Selected studies and relevant models are listed in Table 3. The core of these models mainly lies in how to quantify the three key components of flooding in urban systems – rainfall, surface runoff and drainage flows – as shown in Figure 3. The key methods used in each type of model are summarised below.

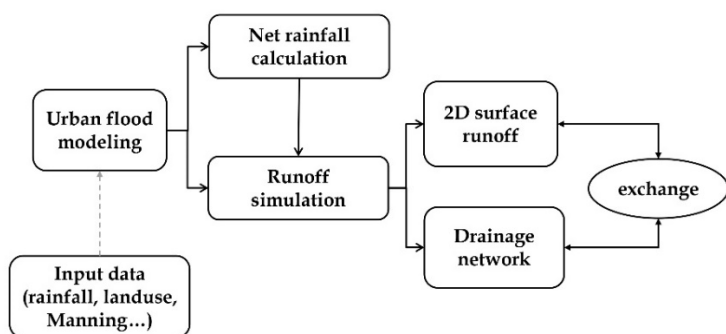

Figure 3: Key components of urban flood modelling.

Table 3: Summary of the characteristics pertinent to urban flood models.

| Representative models       |                                 | Model Equations                 | Acceleration Method                             | Rainfall-runoff | drainage network module   | Status   |
|-----------------------------|---------------------------------|---------------------------------|-------------------------------------------------|-----------------|---------------------------|----------|
| Drainage network models     | Djordjevic et al. (1999)        | 1D Saint-Venant equations       | No                                              | No              | Yes                       | Research |
|                             | Schmitt et al. (2004)           | 1D Saint-Venant equations       | No                                              | No              | Yes                       | Research |
| SWE-based models            | FloodMap (Yu, 2010)             | 2D diffusive wave model         | MPI                                             | Yes             | No                        | Research |
|                             | LISFLOOD-FP (Bates et al. 2010) | Inertial formulation of 2D SWEs | OpenMP                                          | No              | No                        | Research |
|                             | UIM (Chen et al. 2012)          | 2D diffusive wave model         | No                                              | Yes             | HEC-1                     | Research |
|                             | P-DWave (Leandro et al. 2016)   | 2D diffusive wave model         | OpenMP                                          | Yes             | 1D Saint-Venant equations | Research |
|                             | PRIMo (Sanders et al. 2019)     | 2D SWEs based on upscaled grids | single process multiple data parallel algorithm | Yes             | No                        | Research |
|                             | RMA (Rao 2005)                  | simplified 2D SWEs              | MPI                                             | Yes             | No                        | Research |
| UPFLOOD (Huang et al. 2019) | 2D diffusive wave model         | No                              | Yes                                             | No              | Research                  |          |



|                            |                                                                        |                                            |              |     |                                    |          |
|----------------------------|------------------------------------------------------------------------|--------------------------------------------|--------------|-----|------------------------------------|----------|
|                            | TRENT (Villanueva et al. 2006)                                         | 2D full SWEs                               | No           | No  | No                                 | Research |
|                            | Porosity-based models (e.g. Guinot et al., 2017; Bruwier et al., 2017) | 2D full SWEs with porosity in coarse grids | No           | No  | No                                 | Research |
|                            | CityCAT (Glenis et al. 2018)                                           | 2D full SWEs                               | Amazon Cloud | Yes | MFP-model (Bourdarias et al. 2011) | Research |
|                            | Hou et al. (2018)                                                      | 2D full SWEs                               | GPU          | Yes | No                                 | Research |
|                            | HiPIMS (Xia et al. 2019)                                               | 2D full SWEs                               | GPU          | Yes | 1D Saint-Venant equations          | Research |
|                            | Henonin et al (2015)                                                   | 2D full SWEs                               | No           | Yes | No                                 | Research |
|                            | Liu et al. (2019)                                                      | 2D full SWEs                               | GPU          | Yes | No                                 | Research |
|                            | Rajib et al. (2020)                                                    | Inertial formulation of 2D SWEs            | OpenMP       | No  | No                                 | Research |
| Hydrogeomorphic approaches | Nardi et al (2018)                                                     | hydrogeomorphic paradigm                   | No           | Yes | No                                 | Research |
|                            | GeoFlood (Zheng et al. 2018)                                           | hydrogeomorphic paradigm                   | No           | Yes | No                                 | Research |
| Other methods              | CADDIES-caflood (Guidolin et al., 2016)                                | cellular automata                          | GPU          | No  | No                                 | Research |
|                            | Bermudez et al. (2018)                                                 | ANNs                                       | No           | Yes | Yes                                | Research |

### 95 3.1 Drainage network models

The drainage network is the key infrastructure that drains stormwater runoff in urban areas. Inundation in urban surfaces is always caused by the surcharge, which means the capacity of the drainage network cannot support the urban surface runoff. Therefore, drainage network models are often used for simulating urban stormwater runoff when detailed pipe-network data is available (Lee et al., 2019). The main goals of such models are to simulate the streamflow in the underground drainage network and to provide the flow hydrograph at the outlets of urban catchments or sub-catchments. Drainage network models are mainly based on one-dimensional (1D) Saint-Venant equations, complete (dynamic wave; Eq. (1) and (2) for open channel flows, Eq. (3) and (4) for pressured flows) or simplified forms (diffusion wave and inertial-based). These models were also called ‘0-term’ models (Neelz et al., 2013) corresponding to the full-term shallow water based models.

$$\frac{\partial Z}{\partial t} + \frac{1}{B} \frac{\partial Q}{\partial x} = 0 \quad (1)$$

$$105 \quad \frac{\partial Q}{\partial t} + \frac{\partial}{\partial x} \left( \frac{Q^2}{A} \right) + gA \frac{\partial Z}{\partial x} + gAS_f = 0 \quad (2)$$



where  $Q$  represents the flow discharge,  $Z$  represents the water level,  $S_f$  represents the friction slope,  $A$  is the flow cross-section area,  $B$  is the width of water surface,  $t$  is time, and  $g$  is the gravitational acceleration.

$$\frac{\partial H}{\partial t} + \frac{a^2}{gA} \frac{\partial Q}{\partial x} = 0 \quad (3)$$

$$\frac{\partial Q}{\partial t} + \frac{\partial}{\partial x} \left( \frac{Q^2}{A} \right) + gA \frac{\partial Z}{\partial x} + gAS_f = 0 \quad (4)$$

110 where  $H$  is the piezometric head, and  $a$  is the wave velocity.

A drainage network model is generally coupled with an urban hydrological or hydraulic model to quantify surface runoff on the urban surface. For example, urban hydrological models, such as the Urban Drainage and Sewer Model (MOUSE) (DHI, 2002), EPA SWMM (Rossman, 2010) and other research models (Schmitt et al., 2004; Simoes et al., 2010), are frequently implemented or redeveloped to simulate urban rainfall-runoff and flood overcharge from drainage maintenance holes.

115 However, these models cannot reproduce the dynamic processes of urban inundation. To simulate urban surface water flooding, dual drainage models that couple of drainage networks with urban street networks have been developed (Djordjevic et al., 2005; Simoes et al., 2010). During flood events, drainage pipe flows generally produce surcharge at urban drainage manholes, resulting in flooding on the street surface. Dual drainage models take into account both flows within the drainage system and surcharge over the streets during intense rainfall. This type of model has two interactive modules: (1) an underground module

120 that consists of a sewer system with known manholes, inlets, and control structures and (2) a surface module including flow paths, retention basins in local depressions or other artificial control structures (brinks, ponds) made of channels (Mark et al., 2004; Djordjevic et al., 2005). In essence, the 1D model represents the surface flow path (mainly streets) on top of a 1D-pipe-flow model, with exchanges through gully port, catch basin or other coupling junctures. Then, urban flood risks are assessed based on a dual-drainage-modelled output hydrograph, the water remaining in the drainage network, and water depths on street

125 surfaces with the aid of the analytical capabilities of Geographic Information System (GIS). However, 1D model cannot be used to reproduce the rainfall-flood process in the whole urban. It is considered over-assured when treating surface flow as 1D channelled flow, which clearly limits its application.

### 3.2 Shallow water-based models

In recent decades, high-resolution Digital Elevation Model (DEM) and Digital Surface Model (DSM) data with more detailed

130 spatial information are increasingly available. Hydrodynamic models built upon SWEs have demonstrated strong capabilities in providing more detailed flood information in urban areas, such as distributed floodwater depths and velocities. SWE-based models have been frequently applied to fluvial and coastal flooding but were recently refined for urban surface water flooding (Gomez et al., 2011; Xia et al., 2017). Based on comprehensive reviews of SWEs-based models for both fluvial flows and urban surface water, we summarise the governing equations as below (Audusse et al., 2004; Liang and Marche, 2009; Toro,

135 2013).

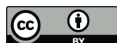

$$\frac{\partial h}{\partial t} + \frac{\partial q_x}{\partial x} + \frac{\partial q_y}{\partial y} = R + E \quad (5)$$

$$\frac{\partial q_x}{\partial t} + \frac{\partial}{\partial x}(uq_x) + \frac{\partial}{\partial y}(vq_x) = S_{bx} + S_{fx} \quad (6)$$

$$\frac{\partial q_y}{\partial t} + \frac{\partial}{\partial x}(uq_y) + \frac{\partial}{\partial y}(vq_y) = S_{by} + S_{fy} \quad (7)$$

①            ②            ②            ③        ④

140 where  $x$  and  $y$  are the two Cartesian directions,  $t$  is time,  $h$  is the water depth,  $q_x$  and  $q_y$  are the  $x$  and  $y$  components of the  
discharge per unit width,  $u$  and  $v$  are the  $x$  and  $y$  components of the flow velocity,  $z$  is the bed elevation,  $g$  is the gravitational  
acceleration,  $R$  is the source or sink term representing net rainfall intensity (runoff term), and  $E$  is a pipe-surface exchange  
flow term.  $S_b$  and  $S_f$  are the bed slope source term vectors and friction effect source term vectors, respectively. The numbers  
below the equation represent the different terms of the shallow water equations: ① local acceleration, ② convective  
145 acceleration, ③ pressure + bed gradients and ④ friction.

### 3.2.1 Simplified 2D shallow water models

SWE-based models have been explored in recent decades for improving both the efficiency and accuracy of simulations.  
However, there are challenges to modelling urban surface water flood using this approach, due to the complex and irregular  
terrains and the lack of sufficient input data, especially for large-scale modelling (Leandro et al., 2016). Since full shallow  
150 water models are computationally expensive, some studies suggest omitting or approximating less significant terms in Eq. (5–  
7) to reduce model complexity and save computational costs (e.g. Yu and Lanes, 2006; Bates et al., 2010; Martins et al., 2017a;  
Sanders et al., 2019). The simplified SWE-based models include 2D diffusion wave models that neglect the inertial (local  
acceleration term ①) and advection (convective acceleration term ②) terms, ‘3-term’ models (Bradbrook et al., 2004; Bates  
et al., 2010), and 2D kinematic wave models that omit pressure terms (③) as well, also called ‘2-term’ models (Hunter et al.,  
155 2007).

The kinematic wave model was initially developed for fluvial flooding with deeper water (e.g. Singh, 2001; Hunter et al.,  
2007). However, major assumptions have to be made when being applied in urban surface water flooding, which has relatively  
shallower water. Such 2D kinematic wave models can give a reasonable level of accuracy only for simple flow regimes (Zhang,  
2014). So, the diffusion wave approximation, introduced by Cunge et al. (1980), was considered a more practical simplification.  
160 The diffusion wave model is also called the zero inertial model. Yet, the lack of inertial terms may raise issues of model  
accuracy and stability, e.g. the control of calculation time. When the constant time step is not small enough, ‘chequerboard’-  
type oscillations will be generated, where water in one particular cell drains into the adjacent cell in a single large time step





and flows back in the next time step (Hunter et al., 2005; Zhang, 2014). This results in a loss of water mass, which affects the accuracy in predicting ‘shallower’ urban surface flooding driven by rainfall (Huang et al., 2019).

165 To avoid instability, a flow limiter is generally used in a diffusion wave model to prevent water leakage from a given cell in a single time step. Hunter et al. (2005) proposed an adaptive time step as an alternative to the flow limiter. A similar method is also applied in P-DWave (Leandro et al., 2016). Later work by Hunter et al. (2008) found that a partial inertial model (also known as a local inertial model or simple inertial model) can be set up by including the local acceleration term, which allows the use of a larger time step and eliminates severe oscillation in the water. This assumes that flow advection is inconsequential in floodplains, so the convective acceleration term can be excluded. Several other studies (e.g. Fewtrell et al., 2011; Almeida and Bates, 2013) validated the simplified approach through numerical cases against field data and analytical solutions. Almeida and Bates (2013) applied the partial inertial approximation model to several flow problems, showing that the scheme could provide relatively accurate and efficient results. Several other models have been developed based on a similar theory (e.g. Yu, 2010; Leandro et al., 2016).

175 Applications of these models to real-world events indicate that inundation in urban areas could be adequately modelled if considering inherent uncertainties of various data input and model conceptualisation (Willis et al., 2019). Some studies (e.g. Leandro et al., 2006; Henonin et al., 2015) developed sub-grid models that improve calculation efficiency while ensuring certain accuracy by implementing relatively coarse numerical solutions. To increase model accuracy, Huang et al. (2019) proposed a calculation of the tangential gradient at the cell edge to improve the accuracy. Hunter et al. (2005) also mentioned that owing to the stricter time step control needed for stability, the effect of diffusion wave approximation in saving computational time is not evident in high-resolution simulations.

### 3.2.2 Full 2D shallow water models

Simplified SWE-based models are less computationally expensive compared to full 2D shallow water models because of the simplification or omission of certain hydraulic processes. However, when facing complex flow regimes, e.g. transcritical flows, supercritical flows or shock-like flow discontinuities, full 2D shallow water equations, Eq. (5–7), are essential to reproduce the full flood dynamics. Full SWE-based models have presented a potential for appropriate approximations in specific situations and are commonly used for surface water issues (Sanders et al., 2008; Liang and Marche al., 2009; Ferrari et al., 2019). 2D dynamic wave models have been considered the only option to predict the backwater effects accurately and hydraulic-hydrological discontinuities (Gomez et al., 2011). Fluvial flood models based on full SWEs were developed by solving Eq. (5–7) in past decades. Schemes based on the finite-volume method and approximate Riemann solvers have gained recent attention with their adequate handling of discontinuities in the flow field. The good track record of full-SWE research provides a solid basis for extending its application to urban surface flood modelling. As indicated in Figure 3, urban surface water flooding also includes rainfall, infiltration and flow exchange flow terms. Thus, further efforts are needed to achieve urban surface flood modelling by using full SWEs.



195 There are numerical challenges when applying fluvial flood dynamic model to urban surface water flooding:

- representation of urban terrain
- appropriate processing of shallow surface water in irregular bed
- balance of computational efficiency and accuracy

In recent years, studies have been undertaken to overcome these numerical challenges. For example, Xia et al. (2017)  
200 introduced a numerical scheme for modelling overland flows over complex bed terrains by developing methods to maintain  
numerical stability and accuracy. Different from natural catchments, urban areas contain complex topographic features and  
underground infrastructures that heavily affect urban inundation. For this, some studies proposed a porosity-based SWE model  
to generalise the effects of dense urban buildings (Sanders et al., 2008; Kim et al., 2015; Guinot et al., 2017; Bruwier et al.,  
2017). Bruwier et al. (2017) proposed an approach to determinate the porosity parameters reflecting the different characteristic  
205 size of obstacles. This method can obtain speed-up values between 10 and 100 while the errors on water depths remain low.  
The studies on porosity-based models mostly focus on numerical schemes for solving urban flood dynamics driven by upstream  
inflows, rather than direct rainfall. Few large-scale applications in surface water flooding driven by rainfall have been studied.  
Moreover, sophisticated urban flood models have been developed recently by including detailed urban surface buildings and  
underground drainage systems. For example, Glenis et al. (2018) presented a full 2D SWE-based model that includes not only  
210 a module simulating pipe flow but also representative buildings and urban infrastructures based on high-resolution DEM.

For large-scale applications of full 2D SWEs-based models, high-resolution data, such as DEM/DSM, is required to represent  
urban building blocks and surface conditions, since street-level or meter-scale modelling implies a large number of  
computational grids. Parallel algorithms and speed-up techniques to overcome this dramatic increase in computational costs  
have been the focus in the last decade. Numerous studies have justified that a GPU-based parallel algorithm is capable of  
215 speeding up a flood model by over ten times (e.g. Kalyanapu et al., 2011; Vacondio et al., 2014; Smith and Liang, 2013).  
Particularly for catchment-scale flooding, Xia et al. (2019) developed a GPU algorithm to accelerate a flood model and  
successfully reproduce the rainfall-inundation process in Eden Catchment caused by the 2015 storm Desmond (2500 km<sup>2</sup> with  
resolution of 5m). Hou et al. (2018) presented a GPU-based urban flood model to reproduce a flood event under 100 years  
design storm event in Morpeth town, UK. Many other studies also indicate real-time modelling of flooding is possible in a  
220 domain with over 100 million grids by using GPU accelerated algorithms. Moreover, cloud computing has been used to  
accelerate the sophisticated urban flood model, e.g. Glenis et al. (2018). In summary, to achieve large-scale urban modelling,  
significant assumptions are needed with a simplified model of a coarse scale, as stated in Section 3.2.1, while full SWEs-based  
models are frequently based on GPU or cloud computing.

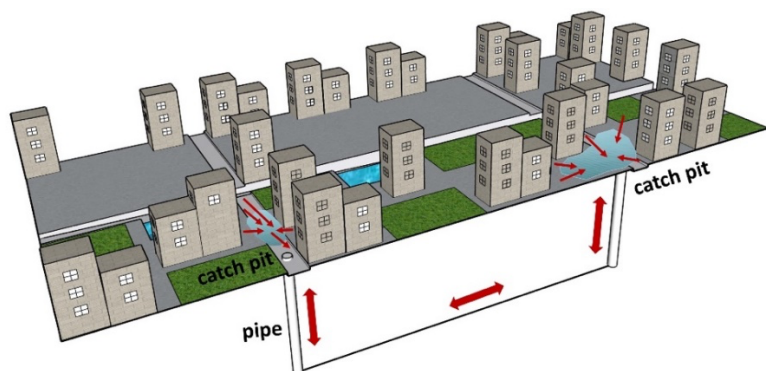

225 **Figure 4: 1D drainage network coupled to 2D surface flow model.**

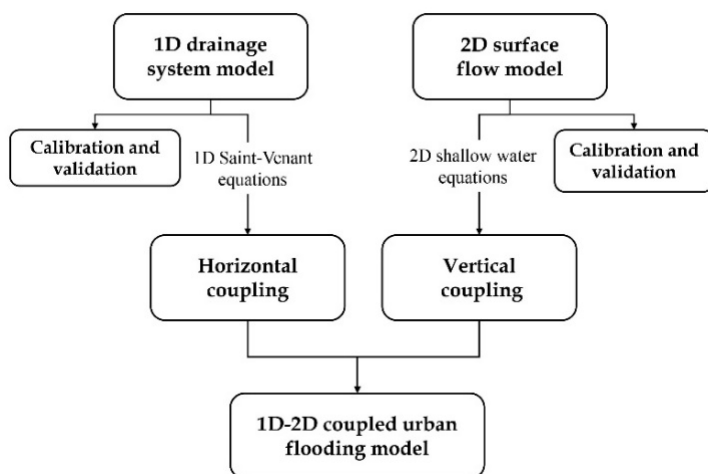

**Figure 5: Coupled 1D-2D urban flood model.**

### 3.2.3 Drainage network coupled to the urban surface model

In SWE-based dynamic models, the effects of drainage networks are mostly either neglected or over-assumed by a constant  
 230 drainage capacity. Even though the studies mentioned above have developed advanced urban flood models, drainage flows  
 were not taken into consideration (e.g. Sanders et al., 2008; Xia et al., 2019). However, the drainage network plays a crucial  
 role in draining urban runoff, which will re-distribute surface water inundation during flooding (demonstrated in Figure 4).  
 The omission or over-assumptions may result in the mis-simulation of surface water depths, inundation coverage and duration,  
 particularly at a localised scale. In fact, the drainage network should be especially taken into account when the duration of the  
 235 inundation represents a key variable for a correct flood risk evaluation. Although still in its infancy, coupled modelling of  
 drainage flow and urban surface water is increasingly attracting attention using 1D pipe flow and 2D surface flow (Seyoum et  
 al., 2011; Chen et al., 2015; Bazin et al., 2014; Leandro and Martins 2016; Martins et al., 2017; Li et al., 2020). Such models



represent drainage flow by a 1D pipe model and quantify the effluents and influents via manholes using the weir or the orifice equations (Bazin et al., 2014). Urban surface water is reproduced by these coupled models with a 2D shallow water model, allowing the simulation of the time series of flow spreading across the urban area.

Based on the existing studies, there are three commonly used methods to characterise drainage flow in urban flooding simulation:

- (1) Using a runoff term  $R$  in one of three typical techniques: ① reducing the rainfall rate  $i$  in the runoff term  $R$  in all of the study area, which is  $i$  minus  $I_p$ , a constant value representing the drainage capacity of the pipe network; ② an additional value is added to the natural infiltration  $I$  of the soil in the runoff term  $R$  of the entire study area to represent the capacity of the drainage network, which is  $I$  plus  $I_p$ ; ③ the drainage capacity of the pipe network is accumulated to the actual layout range (e.g. Environment Agency, 2013; Hou et al., 2018)
- (2) Exchanging discharge through coupling links by various approaches including: orifice and weir equations (Chen et al., 2007; Huang et al., 2019), inlets or gullies capacity (Leandro et al., 2009) and the displacement of manholes covers (Chen et al., 2016).
- (3) Applying 1D Saint-Venant equations, which is the most widely used and accurate of the three techniques. The surface flow spreading process can be calculated by 2D model part obtaining results such as water levels and velocities. Then bidirectional components exchanging is allowed in the junction with the coupling 1D drainage model to realize the reproduce of the urban storm-flood process (Carr & Smith, 2006; Mark & Djordjevic, 2006; Li et al., 2020). A model concept is demonstrated in Figure 5.

The first method does not consider the influence of the surface morphology of the pipe network system and the process of surface runoff flowing into the pipe network. Therefore, the rainwater is reduced before reaching the road surface, which is inconsistent with the actual process. Also, surface runoff into the stormwater inlet is not constant, and the simplification of the first method can be problematic. For a more accurate simulation of urban flooding, the second method has been widely applied in the last decade.

Recently, the third coupling approach has been increasingly investigated. For example, Martins et al. (2017b) validate a 2D shock-capturing flood model coupled with a 1D unsteady pipe flow solver based on both quadrilateral-structured and triangular-unstructured mesh-types. Li et al. (2020) proposed a junction simulation approach, instead of the traditional method solving the continuity equation, which is coupled with the widely used two-component pressure approach (TPA) and led to a new integrated drainage network model. The new 1D-2D coupled drainage network model was validated against an experimental and several idealised test cases to demonstrate its potential for efficient and stable simulation of flow dynamics in drainage networks. However, there are physical complexities and uncertainties for applications in real-world events.



### 3.2.4 Hydrological coupled to hydrodynamic urban flood model

Even with the rapid development of SWE-base models, it is still challenging for both simplified and full models to be applied  
270 in large-scale events. A coupled modelling framework has been developed for large-scale flood modelling (Liu et al., 2019;  
Rajib et al., 2020). More specifically, as shown in Figure 6, the model framework divides the hydraulic structures, river reach  
with complicated flow conditions and urban inundated areas into hydraulic zones, while the rural domain is defined as  
hydrological zones. In hydrological zones, selected hydrological methods are applied for flood routing, and the SWEs are used  
to simulate the surface water dynamic process in hydraulic areas.

275 There are two common hydrological and hydrodynamic coupling approaches, external coupling and internal coupling. For  
external approaches, the results of hydrological models, such as hydrographs, can be applied as upstream or lateral boundary  
conditions for hydraulic models. The one-way and two-way transition are all allowed in this method. It is suitable and has a  
wide range of application urban catchment with complex river network system (e.g. Lian et al., 2007; Mejia & Reed, 2011;  
Kim et al., 2012; Liu et al., 2019). For internal approaches, the hydrological models and hydraulic models are calculated  
280 separately and update the information at the shared boundary with a certain calculation time steps interval. The main intention  
of such model frameworks is to predict urban flooding from the perspective of broader catchment scales efficiently with  
reasonable accuracy. To a certain extent, such model frameworks also reduce the uncertainty effects of hydrodynamic models  
when applying in upstream rural catchments.

### 3.3 Hydrogeomorphic approaches

285 Apart from the models reviewed in section 3.1 and 3.2, an emerging method, the hydrogeomorphic approach, has been recently  
developed for flood hazard management and mapping (Nardi et al. 2013; Zheng et al. 2018). Different from the physical-based  
models above, hydrogeomorphic approaches are based on the concept of fractal river basins or hydrogeomorphic theories, and  
floodplains are identified as unique morphologic landscape features. The inundation area is clearly recognisable by using  
terrain data analyses (Di Baldassarre et al., 2020). It is not necessary to estimate the synthetic flood hydrograph and the  
290 floodplain can be determined consistently in different regions. Specifically, a simplified hydrologic analysis can provide the  
elevation thresholds of the potential inundated grid under different discharge condition then identified the floodplain cells for  
a different return period (Nardi et al., 2018).

More recently, the increasing availability of high-accuracy Digital Terrain Models (DTMs) provide new opportunities for  
morphometric analysis of floodplain mapping. And this floodplain delineation method has been of significant interest because  
295 of the low requirements of time series data and high computational efficiency. It is being developed to apply in global and  
large-scale catchment fluvial flood mapping and has also been applied in urban areas in recent years (Brown de Colstoun et  
al., 2017; Nardi et al., 2018). However, its model concept implies that such a method can predict an approximate inundation



area but cannot simulate the dynamic processes of flooding (time series of water depths, velocities, etc.) that is vital for risk assessment.

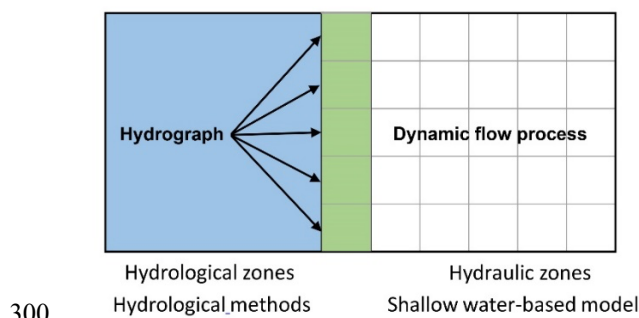

**Figure 6: Divided study area of hydrological and hydrodynamic coupled urban surface model.**

### 3.4 Other methods

**Cellular automata models.** Recently, several studies have evaluated an alternative urban flood modelling approach instead of solving the SWEs, and the cellular automata (CA) approach shows the great prospect in urban inundation simulation (Dottori & Todini, 2011; Ghimire et al., 2013; Guidolin et al., 2016). The CA models represent the discrete simulation area with grids. Apart from the regular properties, such as the state of each cell, distribution of surrounding cells and discrete time step, there are a set of transition rules. Based on the previous state of the cell and neighbouring cells, the rules control the evolution of each cell state (Teng et al., 2017). Austin et al. (2014), successfully developed a series of CA models (e.g. CA1D and BCA1D.) to simulate sewer network flow with various transition rules. Compared with the traditional 1D hydraulic models, these simplified CA models can produce reliable results with high computational efficiency. Guidolin et al. (2016) developed a weighted 2D CA inundation model, CADDIES 2D flood model WCA2D, that obtained the results consistent with the accuracy of those diffuse wave model. CA algorithm is suitable for parallel computing as the hydraulic properties evolution of each cell only requires the state of it and the surrounding cells at the previous calculation time step. However, CA approaches are newly-developing in the field of urban flood simulation just emerging in urban applications and it still need to be further verified in 1D and 2D practical applications.

**Artificial neural network models.** As high-quality data becomes more available, data-driven models, such as artificial neural networks (ANNs), have emerged and can be useful in view of their merits in computational costs and speeds. An ANN is an approximation technique that has been widely used in the water resources field (Yaseen et al., 2015; Wolfs and Willems, 2014; Lin et al., 2020). The applications to urban surface water flooding are still fairly scarce. However, for example, Bermudez et al. (2018) established a model based on two different ANNs to simulate the urban sewer-flood procession, and Berkhahn et al. (2019) presented an ANN-based model to predict the maximum water levels during a flash flood event in an urban river or urban area. The computation time of these models are significantly less than their predecessors, and the results are supported with abundant field data, confirming the importance of having high-quality data.



#### 4 Advantages and limitations

325 Each model has advantages and limitations when applied in urban flooding, which will be discussed in this section. A comparative summary is listed in Table 4.

**Table 4: Comparative summary of the relative advantages and disadvantages of different models.**

| Method                     |                                   | Strength                                                                                                                                                                                                   | Limitation                                                                                                                                                                                                                         | Suitability                                                                                                                                                                                                                                              |
|----------------------------|-----------------------------------|------------------------------------------------------------------------------------------------------------------------------------------------------------------------------------------------------------|------------------------------------------------------------------------------------------------------------------------------------------------------------------------------------------------------------------------------------|----------------------------------------------------------------------------------------------------------------------------------------------------------------------------------------------------------------------------------------------------------|
| Drainage network models    |                                   | <ul style="list-style-type: none"> <li>• computationally efficient</li> <li>• suitable for various temporal and spatial scale evaluations</li> <li>• quantification of flow in drainage systems</li> </ul> | <ul style="list-style-type: none"> <li>• coarse spatiotemporal resolution</li> <li>• no/little flow dynamics</li> <li>• verification is very data and time demanding (large number of drainage nodes and pipes)</li> </ul>         | <ul style="list-style-type: none"> <li>• drainage system design and evaluation</li> <li>• quantification of outflow of urban catchments</li> <li>• a reference for other inundation models</li> <li>• a tool coupled with surface water model</li> </ul> |
| 2D SWE based models        | Simplified SWEs-based models      | <ul style="list-style-type: none"> <li>• dynamic simulation of urban flooding within relative cheaper computational cost</li> </ul>                                                                        | <ul style="list-style-type: none"> <li>• cannot capture shock flood wave</li> <li>• Less numerical accuracy compared with full SWEs</li> <li>• no pipe flow consideration</li> </ul>                                               | <ul style="list-style-type: none"> <li>• urban flood mapping without high requirement on detailed flow dynamics</li> <li>• faster urban flood simulations</li> </ul>                                                                                     |
|                            | Full SWEs-based models            | <ul style="list-style-type: none"> <li>• full dynamic simulation</li> <li>• shock-captured</li> <li>• be able to simulate the flow-infrastructure interactions</li> </ul>                                  | <ul style="list-style-type: none"> <li>• computationally expensive</li> <li>• high requirement for data inputs</li> <li>• no pipe flow consideration or over assumption</li> </ul>                                                 | <ul style="list-style-type: none"> <li>• quantification of local urban flood dynamics without pipe</li> <li>• urban flood model in urban areas with high-quality DEM/DSM</li> <li>• design and evaluation of flood infrastructures</li> </ul>            |
|                            | Coupled with drainage network     | <ul style="list-style-type: none"> <li>• can simulate drainage floods</li> <li>• have potential to simulate urban flooding more accurately</li> </ul>                                                      | <ul style="list-style-type: none"> <li>• computationally expensive</li> <li>• requirement of good-quality data input</li> </ul>                                                                                                    | <ul style="list-style-type: none"> <li>• quantification of drainage flooding</li> <li>• simulation of local urban flood dynamics with pipe</li> <li>• urban drainage design and evaluation</li> </ul>                                                    |
|                            | Coupled with hydrological methods | <ul style="list-style-type: none"> <li>• computational efficient</li> <li>• plus the strength of its coupled hydraulic models</li> </ul>                                                                   | <ul style="list-style-type: none"> <li>• currently no pipe consideration</li> <li>• plus the limitation of its coupled hydraulic models</li> </ul>                                                                                 | <ul style="list-style-type: none"> <li>• large-scale catchments where natural areas have equal runoff contribution with urban areas</li> </ul>                                                                                                           |
| Hydrogeomorphic approaches |                                   | <ul style="list-style-type: none"> <li>• Less sensitive to data scarcity and time series data unnecessary</li> <li>• Computationally efficient</li> </ul>                                                  | <ul style="list-style-type: none"> <li>• cannot include the role of infrastructures and altered geomorphic signature in urban areas</li> <li>• uncertainty of empirical data</li> <li>• no flow dynamics representation</li> </ul> | <ul style="list-style-type: none"> <li>• preliminary identify inundation areas</li> <li>• a reference for physically representative models.</li> </ul>                                                                                                   |



#### 4.1 Drainage network models

Drainage network models, particularly coupled with hydrological methods, are highly computational efficient owing to their simple structures; thus, they show merits in applications that focus on flood-related hydrological analysis in an urban catchment and have low requirements for the representation of full hydrodynamics. The fast operation of this model type makes it suitable for large-scale simulations with various temporal scale evaluations that require thousands of longer-run simulations with little detail of the flow behaviours. Inclusion of pipe network and manholes in models can help to estimate potential surcharge, which can be used as a reference for other inundation models, e.g. 1D street network models or 2D surface water models. The surface runoff simulation of these models is mainly based on the conceptual hydrological models, or grey-box models. Although urban rainfall-runoff processes can be properly estimated by these models through linking a drainage network, the over-assumption of flow dynamics does not allow for the simulation of surface flow inundation, which is a key indicator for risk assessment. Thus, there will be a lack of detailed spatial dynamic information of urban surface waters, such as flood depth and velocity. Moreover, this type of model usually solves the 1D equations for drainage flows. In the city scale, the drainage network system is often complex with a large number of drainage nodes and pipes. Although automatic GIS procedures can improve efficiency to a certain extent, it is still time-consuming data-demanding to set-up and verifies this type of model. For operational flood management, there is currently a high demand for thorough, detailed spatial information, such as the depth and velocity of surface flow in each street and accurate data for each residence. Drainage network models cannot meet above requirements for urban surface water flooding.

#### 4.2 Shallow water-based models

A power of work has been devoted to developing 2D shallow-water-based numerical models in recent decades. These include simplified and full SWEs models, models coupled with drainage network and even hydrological and hydrodynamic coupled models. In the above overview, SWE-based models have proven to be capable of reproducing surface flow reasonably well for flooding in urban areas, accurately predicting velocity, flood extent and water level. Also, high-resolution topographical data, such as LiDAR data, DEM or DSM, are now becoming available and can have a very fine resolution of about 20 cm or even less in some regions. Several studies have developed applications of SWE-based models in a variety of scales by developing new algorithms or new model framework and utilisation of high-resolution topography data sets. These models are advancing current practices to make practical simulations of urban surface water inundation driven by extreme rainfall.

Simplified and full SWE-based models. Compared to full SWE-based models, simplified SWE-based models have been typically used in larger-scale urban flood modelling with coarser grids and simplified treatment of urban features (e.g. city-scale, even continental scale) because of the relatively low computational costs and the capability in simulating surface water dynamics (e.g. Yu et al., 2016; Wing et al., 2017). However, the inherent model conceptualisation implies that these models cannot capture the shock wave adequately. They may be not an ideal choice when simulating detailed urban flood dynamics with infrastructures.





360 Recently, sophisticated full SWE-based models have also been applied to city-scale flood modelling with the advances of accelerated algorithms (e.g. Glenis et al., 2018; Xia et al., 2019; Sanders and Schubert, 2019). Such models are capable of simulating the full surface water dynamics. However, they require high-quality data, which could result in high uncertainty depending on the data source (Willis et al., 2019). Both simplified and full SWE-based models have weaknesses, and further improvements are current challenges:

- 365
- The concentration of buildings in urban areas plays a vital role in the magnitude of inundation and its hydrodynamics; however, current SWE-based models either ignore its effects or make over-assumptions. Some attempts with the inclusion of urban features mainly focus on small-scale validations of numerical schemes, whereas larger-scale applications have been hardly studied.
  - The computational cost of 2D full SWEs-based models is especially significant for high-resolution modelling, which is necessary for representing urban features, such as buildings. While sometimes acceptable for events-based applications, this price is impractical for real-time simulations that serve for early flood warnings. Despite the rapid development of accelerated computing techniques, 2D shallow water models are still considered not feasible for calculations in very large-scale catchments with fine resolution grids, because the simulation time required may be prohibitive (Neelz and Pender, 2013). It is a current challenge to balance computational efficiency with accuracy by
- 370
- 375 either optimising numerical algorithms or establishing reasonable model structures.

***Drainage network coupled to the urban surface model.*** As a key feature of urban catchment, the drainage network has also been ignored or generalised with over-assumptions as discussed above. Although there are alternative approaches to treat pipe flows, and coupled hydrodynamic models are emerging, they are still in its infancy for real-world applications (Mignot et al., 2019). Theoretical or experimental-scale testing for coupled hydrodynamic models may be successful (Li et al., 2020), but improved model performance has not actually been reported when including a drainage flow model into a real-world surface water flood modelling. Also, the drainage network data and unclear coupling mechanisms of pipe flow and surface water heavily limit its large-scale applications in real-world applications. Nonetheless, the detailed model would be applicable to the detailed flow dynamic investigation in pipe and urban surface systems at a localised scale.

380

***Coupled hydrological and hydrodynamic urban flood models.*** By dividing the simulated domain into hydrological and hydraulic zones, these models alleviate the issue of expensive computational costs that pure hydrodynamic models encounter in large-scale applications. Therefore, they are suitable for predicting urban flooding in large-scale catchments, where natural areas have similar runoff contributions to urban areas. Similarly with pure hydrodynamic models, existing studies also either neglected or made significant assumptions on the treatment of pipe flows.

385



### 4.3 Hydrogeomorphic approaches

390 Hydrogeomorphic approaches can identify the inundation area directly from the topography. Thus, it requires much less computation time and no time-series data. However, there are still many limitations for the application of these.

- Only approximated inundation area can be obtained. Flow dynamic information (water depth, velocity, et al.) cannot be provided.
- The effects of recent anthropogenic modifications on a floodplain or urban surface features will increase uncertainty in a floodplain maps. There is no effective way to characterise infrastructures and the altered geomorphic signature in highly urbanised areas.
- The resolution and accuracy of DTMs, as well as terrain data processing and analysis, are challenging.
- Empirical data related to flood stage are needed to determine the floodplain flow depth scaling relationship. These data have great uncertainties, such as availability and quality, which directly affect whether to get the accurate floodplain area.

400

However, flood mapping can be considered as a complement to physically-based hydrodynamic modelling. For example, using an ungauged condition to preliminarily identify inundation areas can provide references for physically representative models.

## 5 Future challenges

### 5.1 Refinement of SWEs-based models

405 In view of the current advances of urban flood models, there are still deficiencies in improving model reliability and efficiency. Urban areas have many complex underlying surface characteristics, and in reality, when the capacity of drainage networks is insufficient, the pipe flow will over-charge to the ground surface. At present, simulation methods of the exchange of pipe flows and surface waters are only focused on local-scale modelling. Some existing numerical models often directly use empirical formulas or simplified methods that are still lacking in stability and accuracy. Therefore, mechanisms between pipe flow and surface water and their modelling approaches would help simulate drainage flooding in urban areas. This could be accomplished by integrating drainage network models with overland flow routing models as some studies have done, but further refinement is needed. Moreover, the spatial heterogeneity of urban catchments is typically more profound, and surface water depths are generally shallower. Both pose numerical challenges in solving SWEs over frictional and extreme, irregular terrain. Although the application of parallel computing technology to improve the computational efficiency of the model has become a trend, efficient urban flood simulation and even real-time flood prediction with better resolutions are still difficult to achieve. In the light of the high computational costs for large-scale modelling at high-resolution, more accurate and faster model algorithms are urgently needed. This is critical for achieving a city-scale urban flood prediction in real-time.

415



## 5.2 Data-driven approaches

420 With the continuous improvement of remote sensing technology, the data become more readily available. A data-rich  
environment also encourages model calibration, validation and assimilation. In practical terms, the accuracy of terrain data  
obtained from modern LiDAR system has met the requirements for surface flow simulation, but it is necessary to fuse such  
dataset with digital map data of buildings and land use to realize the maximum development and utilization of contained  
information. Furthermore, these terrain data are readily available, and topographical data with a grid scale of roughly 30 m at  
best hardly meets accuracy requirements for urban flood models. Model calibration is an essential way to reduce uncertainty  
425 over model parameters, but to this day, such data has been scarce for urban areas. Despite the frequency of urban floods, field  
observations during urban flooding are rarely available for model calibration and validation. Calibration data will be the key  
factor constraining the future development of urban flood inundation models. Some effective methods or tools are therefore  
urgently needed to infer from these limited data sources, extending the quantity and range of typically available calibration-  
validation data. Moreover, the question of which model conceptualisation is more appropriate for urban surface water flooding  
430 is still unanswered and in need of further investigation with the support of high-quality data.

Inter-model and interdisciplinary approaches can help to develop the strengths of the various approaches while avoiding  
shortcomings. Wang et al. (2019) show that there are good prospects for developing an interactive model through the use of  
computer-based visualisation and virtual reality technology. The innovation will be helpful to communicate and perceive  
information and encourage greater engagement and awareness of urban flood challenges amongst diverse participants. The  
435 astute combination of models is promising and successfully developed and applied in the future.

## 6 Conclusion

This paper presents a comprehensive review of the current advanced urban flood models. Over the last several decades, there  
have been a variety of methods based on different theories to model various components of urban flooding, yielding a wide  
choice space for researchers and practitioners. Based on the discussion above, this paper provides insights into urban flood  
440 models, current advances and future challenges. In summary, a drainage network model is a valuable tool with which an urban  
hydrological method can be coupled. This model is suitable for evaluating and designing a drainage system and assessing flood  
risk. SWEs-based models have received much attention in the last ten years because of their capability of reproducing the flow  
dynamics of urban surface water flooding. Simplified 2D SWEs-based models are widely used in large-scale urban flood  
simulation with major assumptions for the purpose of regional-/city-/continental-scale risk assessment owing to relatively low  
445 computational cost. Full 2D SWEs-based models have proven to be capable of simulating flooding in urban areas with complex  
urban features, but the particularities of urban areas still pose great challenges in both appropriate model generalisation and  
robust numerical algorithms development. Ongoing research on acceleration methods shows promising developments to speed

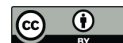

up 2D models and raises hope for real-time applications with better resolutions in the near future. However, reliable modelling of urban surface water flooding will continue to require quality real-world data.

#### 450 **Author Contributions**

K.G. drafted the first version of the manuscript; M.G. do the supervision, design of the study, and revision; D.Y. helped review and comments.

#### **Competing interests**

The authors declare that they have no conflict of interest.

#### 455 **Acknowledgements**

The study is financially supported by Early Career Scheme from Hong Kong Research Grant Council (Grant number: 27202419).

#### **References**

- Almeida, G., & Bates, P. (2013). Applicability of the local inertial approximation of the shallow water equations to flood  
460 modeling. *Water Resources Research*, 49(8), 4833-4844.
- Audusse, E., Bouchut, F., Bristeau, M.O., Klein, R. and Perthame, B.T. (2004). A fast and stable well-balanced scheme with hydrostatic reconstruction for shallow water flows. *SIAM Journal on Scientific Computing*, 25(6), 2050-2065.
- Austin, R., Chen, A., Savic, D., & Djordjevic, S. (2014). Quick and accurate Cellular Automata sewer simulator. *Journal of Hydroinformatics*, 16(6), 1359-1374.
- 465 Barredo, J.I., (2009). Normalised flood losses in Europe: 1970-2006. *Natural Hazards and Earth System Sciences*. 9 (1), 97-104.
- Barredo, J., Saurí, D., & Llasat, M. (2012). Assessing trends in insured losses from floods in Spain 1971-2008. *Natural Hazards and Earth System Sciences*, 12(5), 1723-1729.
- Bates, P., Horritt, M., & Fewtrell, T. (2010). A simple inertial formulation of the shallow water equations for efficient two-  
470 dimensional flood inundation modelling. *Journal of Hydrology*, 387(1), 33-45.



- Bazin, P. H., Nakagawa, H., Kawaike, K., Paquier, A., & Mignot, E. (2014). Modeling flow exchanges between a street and an underground drainage pipe during urban floods. *Journal of Hydraulic Engineering*, 140(10), *Journal of Hydraulic Engineering*, 1 October 2014, Vol.140(10).
- Berkhahn, S., Fuchs, L., & Neuweiler, I. (2019). An ensemble neural network model for real-time prediction of urban floods. 475 *Journal of Hydrology*, 575, 743-754.
- Bermudez, M., Ntegeka, V., Wolfs, V., & Willems, P. (2018). Development and Comparison of Two Fast Surrogate Models for Urban Pluvial Flood Simulations. *Water Resources Management*, 32(8), 2801-2815.
- Bernet, V. Prasuhn, & R. Weingartner. (2017). Surface water floods in Switzerland: What insurance claim records tell us about the damage in space and time. *Natural Hazards and Earth System Sciences*, 17(9), 1659-1682.
- 480 BMT WBM, (2010). TUFLOW User Manual. GIS Based 2D/1D Hydrodynamic Modelling. Build 2010-10-AB. BMT WBM Pty Ltd, Brisbane, Australia.
- Booth, A, Sutton, A, & Papaioannou, D. (2016). *Systematic Approaches to a Successful Literature Review*. Sage.
- Bourdarias, C., Ersoy, M., & Gerbi, S. (2011). A mathematical model for unsteady mixed flows in closed water pipes. 55(2), 221-244.
- 485 Bradbrook, K.F., Lane, S.N., Waller, S.G., and Bates, P.D. (2004). Two dimensional diffusion wave modelling of flood inundation using a simplified channel representation. *International Journal of River Basin Management*. 2, 211-223.
- Brown de Colstoun, E. C., Huang, C., Wang, P., Tilton, J. C., Tan, B., Phillips, J., and Wolfe, R. E. (2017). Global Man-Made Impervious Surface (GMIS) Dataset from Landsat, NASA Socioeconomic Data and Applications Center (SEDAC), Palisades, NY, USA.
- 490 Bruwier, M., Archambeau, Erpicum, Piroton, & Dewals. (2017). Shallow-water models with anisotropic porosity and merging for flood modelling on Cartesian grids. *Journal of Hydrology*, 554, 693-709.
- Carr, R. S. & Smith, G. P. (2006) Linking of 2D and pipe hydraulic models at fine spatial scales. 7th International Conference on Urban Drainage Modelling and 4th International Conference on Water Sensitive Urban Design, 2-7 April 2006, Melbourne, Australia, 2, 361-368.
- 495 Chen, A.S., Djordjevic, S., Leandro, J. and Savic, D., (2007). The urban inundation model with bidirectional flow interaction between 2D overland surface and 1D sewer networks. NOVATECH 2007.
- Chen, A.S., Evans, B., Djordjevic, S., Savic, D.A., (2012). A coarse-grid approach to representing building blockage effects in 2D urban flood modelling. *Journal of Hydrology*. 426-427, 1-16.



- Chen, Y., Zhou, H., Zhang, H., Du, G., Zhou, J., (2015). Urban flood risk warning under rapid urbanization. *Environmental Research*. 139, 3–10.
- Chen, A.S., Leandro, J. and Djordjević, S., (2016). Modelling sewer discharge via displacement of manhole covers during flood events using 1D/2D SIPSON/P-DWave dual drainage simulations. *Urban Water Journal*, 13(8), pp.830-840.
- Cunge, J.A., Holly, F.M. and Verwey, A. (1980). *Practical Aspects of Computational River Hydraulics*. London: Pitman Publishing Ltd.
- DHI, (2002). *MOUSE surface runoff models reference manual*. DHI Software, Horsolm, Denmark.
- Di Baldassarre, Giuliano, Nardi, Fernando, Annis, Antonio, Odongo, Vincent, Rusca, Maria, & Grimaldi, Salvatore. (2020). Brief communication: Comparing hydrological and hydrogeomorphic paradigms for global flood hazard mapping. *Natural Hazards and Earth System Sciences*, 20(5), 1415-1419.
- Djordjevic, S., Prodanovic, D., & Maksimovic, &. (1999). An approach to simulation of dual drainage. *Water Science and Technology*, 39(9), 95-103.
- Djordjevic, S., Prodanovic, D., Maksimovic, C., Ivetic, M. & Savic, D. (2005). SIPSON-simulation of interaction between pipe flow and surface overland flow in networks. *Water Science & Technology*. 52(5), 275–283.
- Dottori, F., Todini, E., (2011). Developments of a flood inundation model based on the cellular automata approach: testing different methods to improve model performance. *Physics and Chemistry of the Earth. Parts A/B/C* 36 (7-8), 266-280.
- Environment Agency, (2013). *What is the updated Flood Map for Surface Water?* (No. Report version 1.0). Bristol, UK.
- Falconer, R., Cobby, D., Smyth, P., Astle, G., Dent, J., Golding, B., (2009). Pluvial flooding: new approaches in flood warning, mapping and risk management. *J. Flood Risk Manage.* 2 (3), 198–208.
- Fernando Nardi, Enrique R. Vivoni, & Salvatore Grimaldi. (2006). Investigating a floodplain scaling relation using a hydrogeomorphic delineation method. *Water Resources Research*, 42(9), W09409-N/a.
- Ferrari, A., Viero, D.P., Vacondio, R., Defina, A. and Mignosa, P., (2019). Flood inundation modeling in urbanized areas: A mesh-independent porosity approach with anisotropic friction. *Advances in water resources*, 125, pp.98-113.
- Fewtrell, T., Duncan, A., Sampson, C., Neal, J., & Bates, P. (2011). Benchmarking urban flood models of varying complexity and scale using high resolution terrestrial LiDAR data. *Physics and Chemistry of the Earth*, 36(7-8), 281-291.
- Ghimire, B., Chen, A., Guidolin, M., Keedwell, E., Djordjevic, S., & Savic, D. (2013). Formulation of a fast 2D urban pluvial flood model using a cellular automata approach. *Journal of Hydroinformatics*, 15(3), 676-686.
- Glenis, V., Kutija, & Kilsby. (2018). A fully hydrodynamic urban flood modelling system representing buildings, green space and interventions. *Environmental Modelling and Software*, 109, 272-292.



- Gomez, M., Macchione, F., & Russo, B. (2011). Methodologies to study the surface hydraulic behaviour of urban catchments during storm events. *Water Science and Technology: A Journal of the International Association on Water Pollution Research*, 63(11), 2666-2673.
- 530
- Gradeci, K., Labonnote, N., Sivertsen, E., & Time, B. (2019). The use of insurance data in the analysis of Surface Water Flood events – A systematic review. *Journal of Hydrology (Amsterdam)*, 568, 194-206.
- Guan, M., Sillanpää, N. and Koivusalo, H. (2015). Modelling and assessment of hydrological changes in a developing urban catchment. *Hydrological Processes*, 29(13), 2880-2894.
- 535
- Guidolin, M., Chen, A., Ghimire, B., Keedwell, E., Djordjevic, S., & Savic, D. (2016). A weighted cellular automata 2D inundation model for rapid flood analysis. *Environmental Modelling and Software*, 84, 378-394.
- Guinot, V., Sanders, B.F. and Schubert, J.E., (2017). Dual integral porosity shallow water model for urban flood modelling. *Advances in Water Resources*, 103, pp.16-31.
- Henonin, J., Hongtao, M., Zheng-Yu, Y., Hartnack, J., Havno, K., Gourbesville, P., & Mark, O. (2015). Citywide multi-grid urban flood modelling: The July 2012 flood in Beijing. *Urban Water Journal: Towards More Flood Resilient Cities*. Guest Editor: Jorge Leandro, 12(1), 52-66.
- 540
- Huang, H., & Zhu, W. (2019). An urban pluvial flood simulation model based on diffusive wave approximation of shallow water equations. *Hydrology Research*, 50(1), 138-154.
- Hou, J., Guo, K., Liu, F., Han, H., Liang, Q., Tong, Y., & Li, P. (2018). Assessing slope forest effect on flood process caused by a short-duration storm in a small catchment. *Water (Switzerland)*, 10(9), Water (Switzerland), 2018, 10(9).
- 545
- Hunter, N., Horritt, M., Bates, P., Wilson, M., & Werner, M. (2005). An adaptive time step solution for raster-based storage cell modelling of floodplain inundation. *Advances In Water Resources*, 28(9), 975-991.
- Hunter, N.M., Bates, P.D., Horritt, M.S., Wilson, M.D. (2007). Simple spatially-distributed models for predicting flood inundation: A review. *Geomorphology*. 90, 208-225.
- 550
- Hunter, N.M., Bates, P.D., Neelz, S., Pender, G., Villanueva, I., Wright, N.G., et al. (2008). Benchmarking 2D hydraulic models for urban flooding, *Proceedings of the Institution of Civil Engineers: Water Management*, 161(1), 13-30.
- IPCC (2013) *Climate Change 2013: Synthesis Report*. Valencia, Spain.
- Kalyanapu, A.J., Shankar, S., Pardyjak, E.R., Judi, D.R. and Burian, S.J. (2011). Assessment of GPU computational enhancement to a 2D flood model. *Environmental Modelling & Software*, 26(8), pp.1009-1016.
- 555
- Kim, Jongho, Warnock, April, Ivanov, Valeriy Y, & Katopodes, Nikolaos D. (2012). Coupled modeling of hydrologic and hydrodynamic processes including overland and channel flow. *Advances in Water Resources*, 37, 104-126.



- Kim, B., Sanders, B.F., Famiglietti, J.S. and Guinot, V. (2015). Urban flood modeling with porous shallow-water equations: A case study of model errors in the presence of anisotropic porosity. *Journal of Hydrology*, 523,680-692.
- Leandro, J., Chen, A., Djordjevic, S., & Savico, D. (2009). Comparison of 1D/1D and 1D/2D Coupled (Sewer/Surface) Hydraulic Models for Urban Flood Simulation. *Journal of Hydraulic Engineering*, 135(6), 495-504.
- 560 Leandro, J., & Martins, R. (2016). A methodology for linking 2D overland flow models with the sewer network model SWMM 5.1 based on dynamic link libraries. *Water Science and Technology: A Journal of the International Association on Water Pollution Research*, 73(12), 3017-3026.
- Leandro, J., Schumann, A. and Pfister, A., 2016. A step towards considering the spatial heterogeneity of urban key features in urban hydrology flood modelling. *Journal of Hydrology*, 535, pp.356-365.
- 565 Lee, S., & An, H. (2019). Evaluating the effect of grid size and type in integrated 1D/2D coupled urban inundation modelling on the interacting discharge between the surface and sewerage system. *Journal of Flood Risk Management*, 12(S1).
- Li, Q., Liang, Q., & Xia, X. (2020). A novel 1D-2D coupled model for hydrodynamic simulation of flows in drainage networks. *Advances in Water Resources*, 2020,137.
- 570 Lian, Yanqing, Chan, I-Chi, Singh, Jaswinder, Demissie, Misganaw, Knapp, Vernon, & Xie, Hua. (2007). Coupling of hydrologic and hydraulic models for the Illinois River Basin. *Journal of Hydrology (Amsterdam)*, 344(3), 210-222.
- Liao, Zhang, Wu, & Chen. (2015). Combined sewer overflow control with LID based on SWMM: An example in Shanghai, China. *Water Science and Technology*, 71(8), 1136-1142.
- Liang, Q. and Marche, F. (2009). Numerical resolution of well-balanced shallow water equations with complex source terms. *Advances in water resources*, 32(6), pp.873-884.
- 575 Mark, O., Weesakul, S., Apirumanekul, C., Aroonnet, S., & Djordjević, S. (2004). Potential and limitations of 1D modelling of urban flooding. *Journal of Hydrology*, 299(3-4), 284-299.
- Mark, O. & Djordjevic, S. (2006) While waiting for the next flood in your city. 7th International Conference of Hydroinformatics, 4-8 September 2006, Nice, France.
- 580 Martins, R., Leandro, J., Chen, A.S. and Djordjević, S., 2017a. A comparison of three dual drainage models: shallow water vs local inertial vs diffusive wave. *Journal of Hydroinformatics*, 19(3), pp.331-348.
- Martins, R., Kesserwani, G., Rubinato, M., Lee, S., Leandro, J., Djordjević, S. and Shucksmith, J.D., 2017b. Validation of 2D shock capturing flood models around a surcharging manhole. *Urban Water Journal*, 14(9), pp.892-899.
- Mejia, A.I. & Reed, S.M. (2011). Evaluating the effects of parameterized cross section shapes and simplified routing with a coupled distributed hydrologic and hydraulic model. *Journal of Hydrology (Amsterdam)*, 409(1), 512-524.
- 585





- Mignota, E., Li, X., and Dewals, B. (2019) Experimental modelling of urban flooding: A review. *Journal of Hydrology*. 568, 334–342.
- Moncoulon, D. P., Naulin, J. X., Wang, Z., Tinard, P., Desarthe, J., Hajji, C., Déqué, M. (2016). Modelling the evolution of the financial impacts of flood and storm surge between 2015 and 2050 in France. *International Journal of Safety and Security Engineering*, 6(2), 141-149.
- 590
- Morita, Masaru, & Yen, Ben Chie. (2002). Modeling of Conjunctive Two-Dimensional Surface-Three-Dimensional Subsurface Flows. *Journal of Hydraulic Engineering*, 128(2), 184-200.
- Nardi, F., Biscarini, C., Di Francesco, S., Manciola, P., & Ubertini, L. (2013). Comparing a large-scale DEM-based floodplain delineation algorithm with standard flood maps: The Tiber River Basin case study. *Irrigation and Drainage*, 62(S2), 11–19.
- 595
- Nardi, Fernando, Morrison, Ryan R, Annis, Antonio, & Grantham, Theodore E. (2018). Hydrologic scaling for hydrogeomorphic floodplain mapping: Insights into human-induced floodplain disconnectivity. *River Research and Applications*, 34(7), 675-685.
- Neelz, S., and Pender, G. (2013). Benchmarking the Latest Generation of 2D Hydraulic Modelling Packages. DEFRA/Environment Agency, UK.
- 600
- Rajib, Adnan, Liu, Zhu, Merwade, Venkatesh, Tavakoly, Ahmad A, & Follum, Michael L. (2020). Towards a large-scale locally relevant flood inundation modeling framework using SWAT and LISFLOOD-FP. *Journal of Hydrology (Amsterdam)*, 581, 124406.
- Rao, P. (2005). A parallel RMA2 model for simulating large-scale free surface flows. *Environmental Modelling and Software*, 20(1), 47-53.
- 605
- Rossman, L.A. (2010). Storm water management model user's manual, version 5.0 (p. 276). Cincinnati: National Risk Management Research Laboratory, Office of Research and Development, US Environmental Protection Agency.
- Sanders, B.F., Schubert, J.E. and Gallegos, H.A. (2008). Integral formulation of shallow-water equations with anisotropic porosity for urban flood modeling. *Journal of Hydrology*, 362(1-2), pp.19-38.
- Sanders, B., & Schubert, J. (2019). PRIMo: Parallel raster inundation model. *Advances in Water Resources*, 126, 79-95.
- 610
- Schmitt, T. G., Thomas, M. & Ettrich, N. (2004) Analysis and modelling of flooding in urban drainage systems. *Journal of Hydrology*. 299, 300-311.
- Seyoum, S. D., Vojinovic, Z. K., Price, R., & Weesakul, S. (2011). Coupled 1D and Noninertia 2D Flood Inundation Model for Simulation of Urban Flooding. *Journal of Hydraulic Engineering*, 138(1), 23-34.



- Sillanpää, N. and Koivusalo, H. (2015). Impacts of urban development on runoff event characteristics and unit hydrographs  
615 across warm and cold seasons in high latitudes. *Journal of Hydrology*, 521, pp.328-340.
- Simoes, N., Leitao, J., Maksimovic, C., Sa Marques, A., & Pina, R. (2010). Sensitivity analysis of surface runoff generation  
in urban flood forecasting. *Water Science and Technology: A Journal of the International Association on Water Pollution  
Research*, 61(10), 2595-2601.
- Singh, V.P. (2001) Kinematic wave modelling in water resources: A historical perspective. *Hydrological Processes*, 15(4),  
620 671-706.
- Smith, L.S. and Liang, Q. (2013). Towards a generalised GPU/CPU shallow-flow modelling tool. *Computers & Fluids*, 88,  
334-343.
- Song, X., Zhang, J., Wang, G., He, U., and Wang, X. (2014). Development and challenges of urban hydrology in a changing  
environment: II: Urban stormwater modeling and management. *Advances in Water Science*. 25, 752-764.
- 625 Syed, K. H., Goodrich, D. C., Myers, D. E., and Sorooshian, S. (2013). Spatial characteristics of thunderstorm rainfall fields  
and their relation to runoff. *Journal of Hydrology*, 271(1-4), 1-21.
- Teng, J., Jakeman, A.J., Vaze, J., Croke, B.F.W., Dutta, D., and Kim, S. (2017). Flood inundation modelling: a review of  
methods, recent advances and uncertainty analysis. *Environmental Modelling & Software*. 90, 201-216.
- Toro, E.F. and Toro, E. (2001). *Shock-capturing methods for free-surface shallow flows* (Vol. 868). New York: Wiley.
- 630 Toro, E.F. (2013). *Riemann solvers and numerical methods for fluid dynamics: a practical introduction*. Springer Science &  
Business Media.
- UNISDR, (2015). *The human cost of weather related disasters, CRED 1995-2015*, Unites Nations, Geneva.
- Vacondio, R., Dal Palu, A. and Mignosa, P. (2014). GPU-enhanced finite volume shallow water solver for fast flood  
simulations. *Environmental modelling & software*, 57, 60-75.
- 635 Villanueva, & N. G. Wright. (2006). Linking Riemann and storage cell models for flood prediction. *Proceedings of the ICE -  
Water Management*, 159(1), 27-33.
- Wang, C., Hou, J., Miller, D., Brown, I., & Jiang, Y. (2019). Flood risk management in sponge cities: The role of integrated  
simulation and 3D visualization. *International Journal of Disaster Risk Reduction*, 39, *International Journal of Disaster Risk  
Reduction*, October 2019, Vol.39.
- 640 Willis, T., Wright, N. and Sleigh, A. (2019). Systematic analysis of uncertainty in 2D flood inundation models. *Environmental  
Modelling & Software*, 122, 104520.



- Wolfs V., Willems P. (2014) Development of discharge-stage curves affected by hysteresis using time varying models, model trees and neural networks. *Environmental Modelling & Software*. 55, 107-119.
- Wobus, Lawson, Jones, Smith, & Martinich. (2014). Estimating monetary damages from flooding in the United States under a changing climate. *Journal of Flood Risk Management*, 7(3), 217-229.
- 645 Xia, X., Liang, Q., Ming, X. and Hou, J. (2017). An efficient and stable hydrodynamic model with novel source term discretization schemes for overland flow and flood simulations. *Water resources research*, 53(5), 3730-3759.
- Xia, X., Liang, Q., & Ming, X. (2019). A full-scale fluvial flood modelling framework based on a high-performance integrated hydrodynamic modelling system (HiPIMS). *Advances in Water Resources*, 132, *Advances in Water Resources*, October 2019, Vol.132.
- 650 Yaseen ZM, El-shafie A, Jaafar O et al (2015) Artificial intelligence based models for stream-flow forecasting: 2000-2015. *Journal of Hydrology*. 530, 829-844.
- Yu, D. and Lane, S.N. (2006). Urban fluvial flood modelling using a two-dimensional diffusion-wave treatment, part 1: mesh resolution effects. *Hydrological Processes: An International Journal*, 20(7), 1541-1565.
- 655 Yu, D. (2010). Parallelization of a two-dimensional flood inundation model based on domain decomposition. *Environmental Modelling and Software*, 25(8), 935-945.
- Yu, D., Yin, J. and Liu, M. (2016). Validating city-scale surface water flood modelling using crowd-sourced data. *Environ. Res. Lett*, 11(12), 1-21.
- Zhang, H. (2014). Urban flood simulation by coupling a hydrodynamic model with a hydrological model. Newcastle University.
- 660 Zhanyan Liu, Hongbin Zhang, & Qiuhua Liang. (2019). A coupled hydrological and hydrodynamic model for flood simulation. *Hydrology Research*, 50(2), 589.
- Zheng, Xing, Maidment, David R, Tarboton, David G, Liu, Yan Y, & Passalacqua, Paola. (2018). GeoFlood: Large-Scale Flood Inundation Mapping Based on High-Resolution Terrain Analysis. *Water Resources Research*, 54(12), 10,013-10,033.
- Zhou, Q., Panduro, T., Thorsen, B., & Arnbjerg-Nielsen, K. (2013). Verification of flood damage modelling using insurance data. *Water Science and Technology*, 68(2), 425-432.
- 665
